# Supplementary material
Source: publisher figshare collection journal article supplement (https://acs.figshare.com/ndownloader/files/7574440)
Supplement: Supplementary file 1 [file 7574440]

## Supporting Information

### Direct Imaging of Dopant Distribution in Polycrystalline ZnO Films

*Lorenzo FANNI<sup>a,\*</sup>, A. Brian AEBERSOLD<sup>b</sup>, Monica MORALES-MASIS<sup>a</sup>, Martin LEDINSKÝ<sup>c</sup>, Stéphane ESCRIG<sup>d</sup>, Aliaksei VETUSHKA<sup>c</sup>, Duncan T.L. ALEXANDER<sup>b</sup>, Aïcha HESSLER-WYSER<sup>a</sup>, Antonín FEJFAR<sup>c</sup>, Cécile HÉBERT<sup>b</sup>, Sylvain NICOLAY<sup>e</sup>, Christophe BALLIF<sup>a,e</sup>*

<sup>a</sup>Ecole Polytechnique Fédérale de Lausanne (EPFL), Institute of Microengineering, Photovoltaics and Thin-Film Electronics Laboratory, Rue de la Maladière 71B, CH-2000 Neuchâtel, Switzerland

<sup>b</sup>Ecole Polytechnique Fédérale de Lausanne (EPFL), Interdisciplinary Centre for Electron Microscopy, Station 12, CH-1015 Lausanne, Switzerland

<sup>c</sup>Laboratory of Nanostructures and Nanomaterials, Institute of Physics ASCR, Cukrovarnická 10, 162 00 Prague 6, Czech Republic

<sup>d</sup>Ecole Polytechnique Fédérale de Lausanne (EPFL), Laboratory for Biological Geochemistry, Station 2, CH-1015 Lausanne, Switzerland

<sup>e</sup>Centre Suisse d'Electronique et Microtechnique, PV-Center, rue Jacques-Droz 1, CH-2002 Neuchâtel, Switzerland

Corresponding Authors

\* E-mail: [lorenzo.p.fanni@gmail.com](mailto:lorenzo.p.fanni@gmail.com)

\*Tel.: +41 21 695 4347. Fax: +41 0 21 695 4201. E-mail: [monica.moralesmasis@epfl.ch](mailto:monica.moralesmasis@epfl.ch)

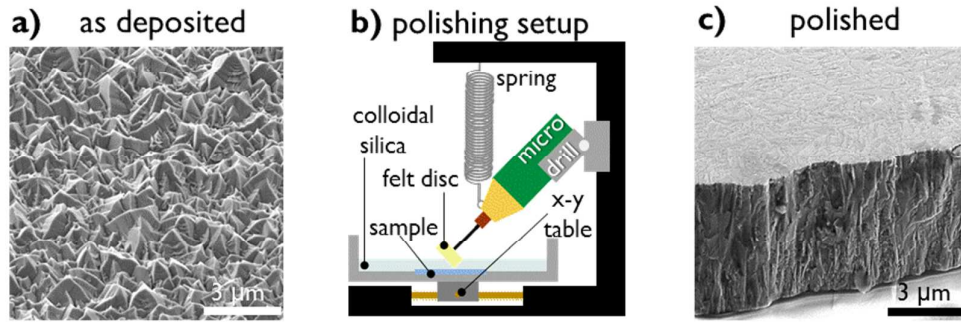

**Figure S1.** Details of the mechano-chemical polishing. **(a)** As deposited *a*-textured ZnO films, tilted view. **(b)** Drawing of the chemical mechanical polishing setup. **(c)** Polished *a*-textured ZnO films, tilted view.

#### alignment of electronic bands

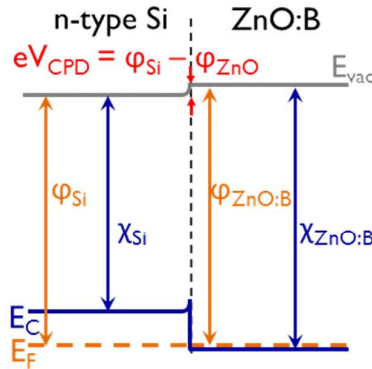

**Figure S2.** Electronic energy band alignment for the electrically connected system composed by tip (n-type Si) and film (degenerately doped ZnO). The contact potential difference  $V_{CPD}$  depends on the difference in workfunction between Si and ZnO that decreases linearly with  $E_F - E_C$ , which in turn depends on the carrier concentration in ZnO.  $E_{vac}$  = vacuum energy,  $\chi$  = electron affinity,  $\phi$  = workfunction.

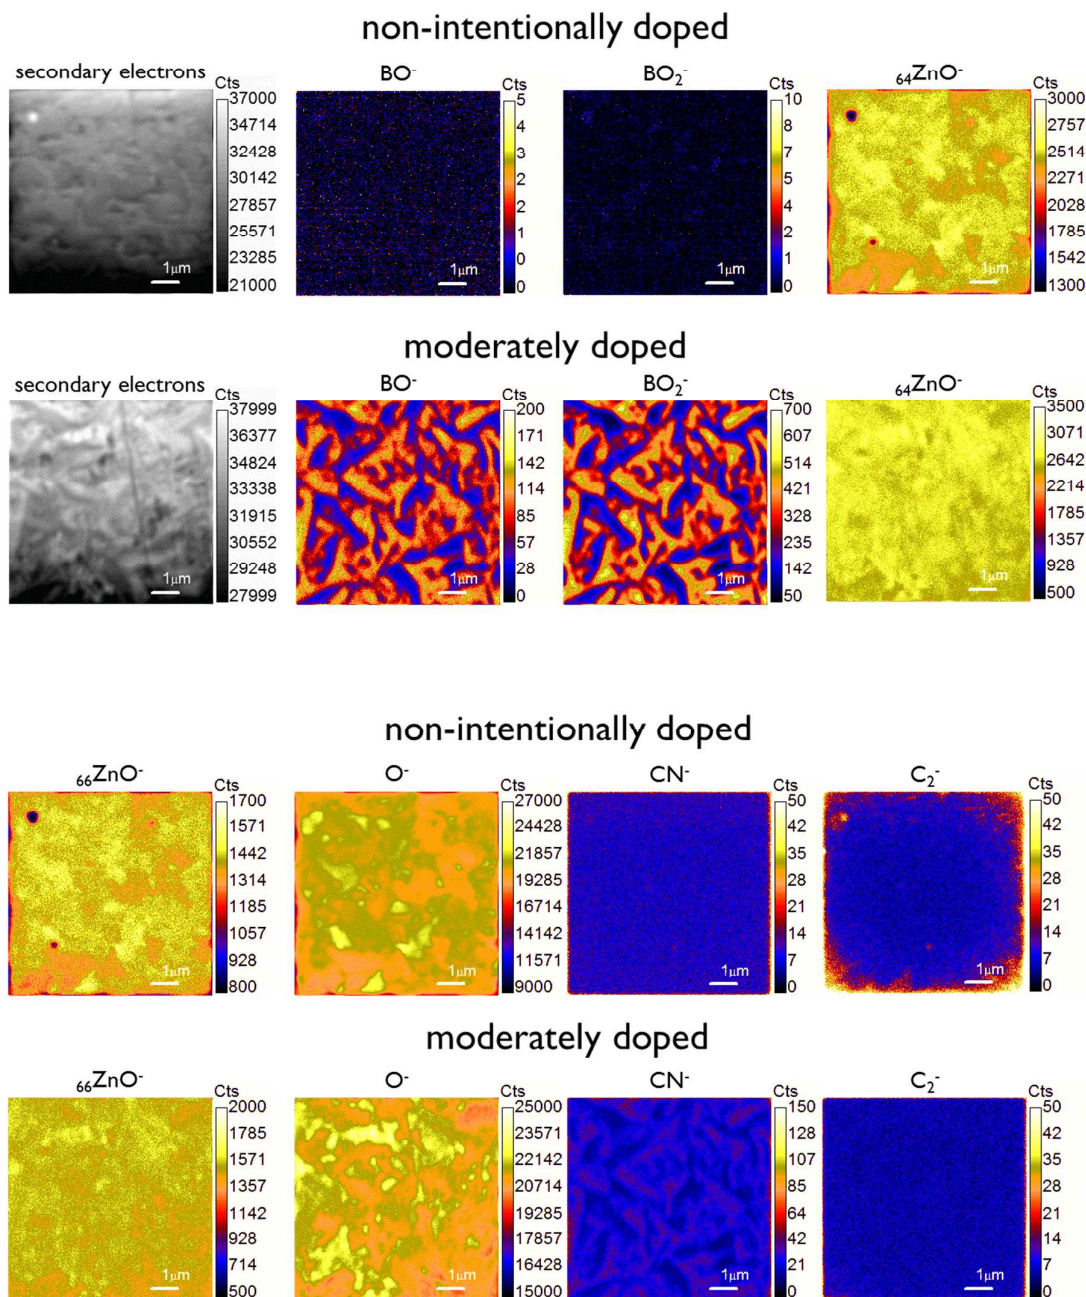

**Figure S3.** Maps of secondary particles emitted by ZnO films obtained using the NanoSIMS technique. Comparison between non-intentionally and moderately doped samples for all the recorded channels: secondary electrons,  $\text{BO}^-$ ,  $\text{BO}_2^-$ ,  $^{64}\text{ZnO}^-$ ,  $^{66}\text{ZnO}^-$ ,  $\text{O}^-$ ,  $\text{CN}^-$ ,  $\text{C}_2^-$ .
